# Supplementary material for: Complex DNA structures trigger copy number variation across the Plasmodium falciparum genome
Source: PubMed Central journal article supplement — Nucleic Acids Res. 2018 Dec 21;47(4):1615–27. doi: 10.1093/nar/gky1268 (PMC6393310; doi:10.1093/nar/gky1268), 2018-12-21
Supplement: gky1268_supplemental_files.pdf [file gky1268_supplemental_files.pdf]

**SUPPLEMENTARY TABLES AND FIGURES**

**Supplementary Table S1: Summary of CNV characteristics used in our analysis.**

| Antimalarial        | Parent clone | Clones  | Putative gene amplified (chromosome)          | Amp. sizes   | Data source | Accession reference |            |
|---------------------|--------------|---------|-----------------------------------------------|--------------|-------------|---------------------|------------|
| <b>DSM1</b>         | Dd2          | C       | Dihydroorotate dehydrogenase (6)              | ~70kb        | [1]         | SRX326516           |            |
|                     |              | D       |                                               | ~95kb        |             | SRX326519           |            |
|                     |              | E       |                                               | ~34kb        |             | N/A                 |            |
|                     |              | F       |                                               | ~39kb        |             | N/A                 |            |
|                     |              | Parent  |                                               | N/A          |             | SRX326518           |            |
| <b>Halofuginone</b> | Dd2          | HFGR11  | Prolyl-tRNA synthetase (12)                   | ~30kb        | [2]         | SRX158283           |            |
|                     |              | HFGR111 |                                               | N/A          |             | SRX200273           |            |
|                     |              | Parent  |                                               | N/A          |             | SRX738616           |            |
| <b>MMV029272</b>    | 3d7          | R2B2    | ABC transporter I family member, putative (1) | ~62kb        |             | SRX2479359          |            |
|                     |              | R2C9    |                                               |              |             | SRX2479247          |            |
|                     |              | R3E7    |                                               |              |             | SRX2479252          |            |
|                     |              | R3F10   |                                               |              |             | SRX2479375          |            |
|                     |              | Parent  |                                               |              |             | N/A                 | SRX2479354 |
| <b>MMV019662</b>    | 3d7          | 1C4     | Lipid/sterol:H+ symporter (1)                 |              |             | SRX2479223          |            |
|                     |              | 2B6     |                                               |              |             | SRX2479224          |            |
|                     |              | 2F6     |                                               |              |             | SRX2479226          |            |
|                     |              | 3-G6    |                                               |              |             | SRX2479265          |            |
|                     |              | F7      |                                               |              |             | SRX2479256          |            |
|                     |              | 2D6     |                                               |              |             | ~95kb               | SRX2479372 |
|                     |              | 3B6     |                                               |              |             | ~99kb               | SRX2479268 |
|                     |              | 1F4     |                                               |              |             |                     | SRX2479340 |
|                     |              | 1F9     |                                               |              |             | ~52kb               | SRX2479347 |
|                     |              | 33XC3   |                                               |              |             | ~35kb               | SRX2479331 |
|                     |              | 3C3     |                                               |              |             |                     | SRX2479355 |
|                     |              | 3F10    |                                               |              |             | ~51kb               | SRX2479219 |
|                     |              | 2G6     |                                               |              |             |                     | SRX2479399 |
|                     |              | 2G9     |                                               |              |             | ~41kb               | SRX2479357 |
|                     |              | Parent  |                                               |              |             | N/A                 | SRX2479243 |
| <b>MMV028038</b>    | 3d7          | 2E3     | Lipid/sterol:H+ symporter (1)                 |              |             | SRX2479393          |            |
|                     |              | 2F10    |                                               |              |             | SRX2479204          |            |
|                     |              | 3E9     |                                               |              |             | SRX2479235          |            |
|                     |              | 3F5     |                                               |              |             | ~51kb               | SRX2479392 |
|                     |              | 1E10    |                                               |              |             |                     | SRX2479244 |
|                     |              | 1E3     |                                               |              |             | ~41kb               | SRX2479242 |
|                     |              | Parent  |                                               |              |             | N/A                 | SRX2479243 |
| <b>MMV08149</b>     | Dd2          | 1B2     | Unknown (10, 12)                              | ~18kb, ~30kb | [3]         | SRX1561330          |            |
|                     |              | Parent  |                                               | N/A          |             | SRX5161067          |            |
| <b>Cladosporin</b>  | Dd2          | CladoA  | Lysyl tRNA Synthetase, (13)                   | ~58kb        |             | SRX2479289          |            |
|                     |              | CladoB  |                                               | ~50kb        |             | SRX2479338          |            |
|                     |              | CladoC  |                                               | ~35kb        |             | SRX2479378          |            |
|                     |              | Parent  |                                               | N/A          |             | SRX2479309          |            |
| <b>Primaquine</b>   | Dd2          | PQA11   | Patatin-like phospholipase, putative (10)     | ~18kb        |             | SRX2479288          |            |
|                     |              | Parent  |                                               | N/A          |             | SRX2479263          |            |

N/A = whole genome sequencing not available (For DSM1 clones, CNVs were determined by PCR across breakpoints and microarrays).

**Supplementary Table S2: Alignment statistics and mapping quality.**

| Clone                       | # of mapped reads | % mapped of total reads | Mean coverage (reads/bp $\pm$ std. dev) | Mean Mapping Quality* | Median Insert Size* | Mean Coverage 2kb around breakpoint regions (reads/bp $\pm$ std. dev) | Mean Coverage 100bp around breakpoint regions (reads/bp $\pm$ std. dev) |
|-----------------------------|-------------------|-------------------------|-----------------------------------------|-----------------------|---------------------|-----------------------------------------------------------------------|-------------------------------------------------------------------------|
| DSM1-C                      | 23,606,598        | 98.73                   | 96.2 $\pm$ 68                           | 57.0                  | 308                 | 465.8 $\pm$ 435.6                                                     | 315.4 $\pm$ 249.9                                                       |
| DSM1-D                      | 58,986,651        | 97.95                   | 210.2 $\pm$ 121.7                       | 54.82                 | 261                 | 872.3 $\pm$ 737.1                                                     | 125,592.0 $\pm$ 256,594.6                                               |
| HFGR11                      | 35,595,585        | 98.02                   | 143.9 $\pm$ 63.4                        | 56.4                  | 144                 | 158.2 $\pm$ 37.9                                                      | 97.1 $\pm$ 25.0                                                         |
| HFGR111                     | 35,477,690        | 98.18                   | 142.4 $\pm$ 91.6                        | 54.46                 | 150                 | 255.4 $\pm$ 105.2                                                     | 180.0 $\pm$ 65.9                                                        |
| CladoA                      | 21,978,885        | 100                     | 54.7 $\pm$ 34.8                         | 55.4                  | 321                 | 118.5 $\pm$ 94.2                                                      | 58.8 $\pm$ 30.9                                                         |
| CladoB                      | 31,695,884        | 100                     | 79.5 $\pm$ 54.2                         | 55.6                  | 349                 | 152.3 $\pm$ 120.4                                                     | 127.2 $\pm$ 68.9                                                        |
| CladoC                      | 39,472,609        | 100                     | 99.3 $\pm$ 64.9                         | 55.8                  | 294                 | 237.2 $\pm$ 209.0                                                     | 117.0 $\pm$ 89.0                                                        |
| PQA11                       | 11,056,363        | 100                     | 47.8 $\pm$ 76.5                         | 57.0                  | 267                 | 60.7 $\pm$ 26.5                                                       | 45.9 $\pm$ 22.3                                                         |
| F7                          | 26,916,655        | 100                     | 111.5 $\pm$ 141.4                       | 57.8                  | 242                 | 127.0 $\pm$ 70.9                                                      | 73.2 $\pm$ 33.4                                                         |
| 3B6                         | 15,482,302        | 100                     | 63.5 $\pm$ 331.6                        | 57.8                  | 238                 | 60.1 $\pm$ 49.7                                                       | 30.3 $\pm$ 12.0                                                         |
| 1F4                         | 20,833,721        | 100                     | 85.0 $\pm$ 95.9                         | 57.8                  | 227                 | 118.1 $\pm$ 65.8                                                      | 55.9 $\pm$ 33.3                                                         |
| 2G9                         | 15,622,275        | 100                     | 61.6 $\pm$ 77.2                         | 57.8                  | 182                 | 81.3 $\pm$ 52.2                                                       | 48.4 $\pm$ 29.5                                                         |
| 1E3                         | 28,662,532        | 100                     | 106.7 $\pm$ 127.2                       | 57.7                  | 122                 | 117.0 $\pm$ 85.9                                                      | 63.8 $\pm$ 39.9                                                         |
| 33XC3                       | 20,214,893        | 100                     | 80.1 $\pm$ 74.7                         | 57.6                  | 160                 | 67.7 $\pm$ 31.2                                                       | 60.8 $\pm$ 16.8                                                         |
| 3C3                         | 24,656,913        | 100                     | 97.1 $\pm$ 139.9                        | 57.8                  | 152                 | 84.0 $\pm$ 111.1                                                      | 38.59 $\pm$ 25.5                                                        |
| R2B2                        | 21,492,697        | 100                     | 89.2 $\pm$ 184.0                        | 57.7                  | 238                 | 114.7 $\pm$ 72.3                                                      | 23.8 $\pm$ 11.0                                                         |
| 1B2ch10                     | 24,513,373        | 90.23                   | 85.9 $\pm$ 97.3                         | 58.4                  | 250                 | 104.2 $\pm$ 61.8                                                      | 62.5 $\pm$ 20.3                                                         |
| 1B2ch12                     | 24,513,373        | 90.23                   | 85.9 $\pm$ 97.3                         | 58.4                  | 250                 | 94.9 $\pm$ 78.7                                                       | 39.7 $\pm$ 9.5                                                          |
| Clones with non-unique CNVs | # of mapped reads | % mapped of total reads | Mean coverage (reads/bp $\pm$ std. dev) | Mean Mapping Quality* | Median Insert Size  | Mean Coverage 2kb around breakpoint regions (reads/bp $\pm$ std. dev) | Mean Coverage 100bp around breakpoint regions (reads/bp $\pm$ std. dev) |
| R2C9                        | 19,750,338        | 100                     | 81.7 $\pm$ 179.8                        | 57.7                  | 255                 | 127.7 $\pm$ 89.9                                                      | 24.3 $\pm$ 13.5                                                         |
| R3E7                        | 21,127,436        | 100                     | 72.0 $\pm$ 75.1                         | 57.8                  | 213                 | 107.3 $\pm$ 64.5                                                      | 28.2 $\pm$ 13.7                                                         |
| R3F10                       | 27,855,320        | 100                     | 92.6 $\pm$ 97.3                         | 57.6                  | 160                 | 141.0 $\pm$ 95.4                                                      | 26.2 $\pm$ 12.8                                                         |
| 1C4                         | 13,804,219        | 100                     | 56.9 $\pm$ 94.3                         | 56.3                  | 220                 | 78.0 $\pm$ 67.3                                                       | 73.6 $\pm$ 47.0                                                         |
| 2B6                         | 21,906,529        | 100                     | 91.1 $\pm$ 127.2                        | 57.8                  | 253                 | 99.2 $\pm$ 69.2                                                       | 57.7 $\pm$ 30.9                                                         |
| 2F6                         | 25,244,172        | 100                     | 104.6 $\pm$ 120.4                       | 57.8                  | 222                 | 119.6 $\pm$ 68.9                                                      | 84.7 $\pm$ 29.1                                                         |
| 3G6                         | 21,155,622        | 100                     | 87.2 $\pm$ 303.6                        | 57.8                  | 223                 | 90.3 $\pm$ 53.3                                                       | 69.0 $\pm$ 26.3                                                         |
| 2D6                         | 20,427,288        | 100                     | 84.9 $\pm$ 88.0                         | 57.9                  | 247                 | 91.6 $\pm$ 62.5                                                       | 51.7 $\pm$ 19.3                                                         |
| 1F9                         | 33,525,957        | 100                     | 132.0 $\pm$ 178.8                       | 57.8                  | 159                 | 149.6 $\pm$ 85.9                                                      | 77.4 $\pm$ 43.9                                                         |
| 3F10                        | 21,739,212        | 100                     | 80.5 $\pm$ 64.5                         | 57.8                  | 176                 | 107.8 $\pm$ 115.7                                                     | 45.0 $\pm$ 17.8                                                         |
| 2E3                         | 11,170,025        | 100                     | 87.4 $\pm$ 101.3                        | 57.7                  | 128                 | 21.5 $\pm$ 22                                                         | 11.2 $\pm$ 2.8                                                          |
| 2F10                        | 24936046          | 100                     | 86.7 $\pm$ 55.6                         | 57.7                  | 144                 | 104.4 $\pm$ 96.3                                                      | 52.2 $\pm$ 20.8                                                         |
| 3E9                         | 27,252,221        | 100                     | 92.9 $\pm$ 70.6                         | 57.6                  | 132                 | 98.0 $\pm$ 95.9                                                       | 57.8 $\pm$ 29.7                                                         |
| 3F5                         | 29,612,259        | 100                     | 114.6 $\pm$ 138.7                       | 57.7                  | 141                 | 107.4 $\pm$ 97.8                                                      | 53.87 $\pm$ 25.4                                                        |
| 2G6                         | 20,240,247        | 100                     | 80.2 $\pm$ 104.4                        | 57.8                  | 193                 | 114.0 $\pm$ 60.4                                                      | 63.9 $\pm$ 42.1                                                         |
| 1E10                        | 24,613,192        | 100                     | 91.2 $\pm$ 114.9                        | 57.6                  | 122                 | 98.3 $\pm$ 71.2                                                       | 56.8 $\pm$ 31.5                                                         |

\*Mean mapping quality was determined excluding 50kb from each end of chromosomes to avoid telomeric DNA, max value is 60. Median insert sizes are the median distance between mapped forward and reverse reads.

**Supplementary Table S3: Variant statistics and confidence.**

| Clone             | Orientation of amplification | LUMPY Sample Quality | LUMPY PE/SR Support | CNVnator Start       | CNVnator End         | CNVnator Copy # |
|-------------------|------------------------------|----------------------|---------------------|----------------------|----------------------|-----------------|
| DSM1-C            | Tandem                       | 18620.94             | 1025/0              | 79101                | 152500               | 7.2             |
| DSM1-D            | Tandem                       | 8595.33              | 32/0                | 64501                | 158200               | 5.8             |
| HFGRII            | Inverted                     | 174.29               | 3/0                 | N/A                  | N/A                  | N/A             |
| HFGRIII           | Tandem                       | 902.33               | 44/0                | 575001               | 621900               | 2.0             |
| CladoA            | Tandem                       | 2257.46              | 129/0               | 2000301              | 2058400              | 5.3             |
| CladoB            | Tandem                       | 5542.93              | 330/0               | 2005701              | 2055100              | 5.0             |
| CladoC            | Tandem                       | 7587.09              | 445/0               | 2000201              | 2022800              | 5.0             |
| PQA11             | Tandem                       | 957.11               | 59/0                | 290001               | 308800               | 2.9             |
| F7                | Tandem                       | 700.79               | 29/4                | 264301               | 359400               | 2.0             |
| 3B6               | Tandem                       | 338.98               | 39/3                | 264301               | 359300               | 2.2             |
| 1F4               | Tandem                       | 1574.1               | 11/0                | 321501               | 372900               | 2.3             |
| 2G9               | Tandem                       | 964.9                | 39/3                | 321501               | 360300               | 2.4             |
| 1E3               | Tandem                       | 1221.36              | 48/1                | 321601               | 362600               | 2.2             |
| 33XC3             | Tandem                       | 143.15               | 13/1                | 1733601              | 1768700              | 2.1             |
| 3C3               | Tandem                       | 307.73               | 7/1                 | 1726001              | 1767900              | 2.4             |
| R2B2              | Tandem                       | 179.06               | 12/0                | 782801               | 857600               | 2.1             |
| 1B2ch10           | Tandem                       | 231.77               | 22/0                | 285701               | 315700               | 2.4             |
| 1B2ch12           | Tandem                       | 528.74               | 33/0                | 1549901              | 1567200              | 2.3             |
| Supporting Clones | Orientation of amplification | LUMPY Quality Score  | LUMPY PE/SR Support | CNVnator Start       | CNVnator End         | CNVnator Copy # |
| R2C9              | Tandem                       | 459.26               | 24/0                | 783001               | 857600               | 3.0             |
| R3E7              | Tandem                       | 241.39               | 15/0                | 782901               | 856300               | 2.1             |
| R3F10             | Tandem                       | 208.27               | 11/0                | 783001               | 857600               | 2.0             |
| 1C4               | Tandem                       | 707.66               | 29/0                | 266201               | 359400               | 2.0             |
| 2B6               | Tandem                       | 709.47               | 30/1                | 264401               | 356400               | 2.1             |
| 2F6               | Tandem                       | 467.2                | 19/2                | 264301               | 359400               | 2.1             |
| 3G6               | Tandem                       | 437.43               | 17/1                | 266201               | 359400               | 2.1             |
| 2D6               | Inverted                     | 443.03               | 19/3                | 266201               | 359300               | 2.0             |
| 1F9               | Tandem                       | 1766.92              | 74/0                | 321601               | 372900               | 2.2             |
| 2G6               | Tandem                       | 1323.84              | 56/1                | 321601               | 364800               | 2.3             |
| 1E10              | Tandem                       | 969.48               | 38/1                | 321601               | 342600               | 2.2             |
| 3F10              | Tandem                       | 351.89               | 5/2                 | 1718201 <sup>#</sup> | 1770000 <sup>#</sup> | 2.2             |
| 2E3               | Tandem                       | 474.66               | 5/1                 | 1718201 <sup>#</sup> | 1768000 <sup>#</sup> | 2.0             |
| 2F10              | Tandem                       | 106.51               | 5/0                 | 1718201              | 1768000              | 2.1             |
| 3E9               | Tandem                       | 419.7                | 7/1                 | 1718201              | 1768100              | 2.0             |
| 3F5               | Tandem                       | 548.68               | 3/1                 | 1718201              | 1768100              | 2.0             |

Amplification orientation was determined by comparing paired-end sequencing read-mate orientation and strand (Fig. S1). LUMPY sample qualities have no theoretical maximum but >100 are considered high quality calls. PE/SR= paired-end and split-read support respectively. CNVnator was unable to call read-depth analysis but visual inspection of bam file showed increase in coverage indicating presence of CNV. <sup>#</sup>Clones had contiguous duplication calls from CNVnator that were combined for the overall amplification.

**Supplementary Table S4: Comparison of A/T track breakpoint length pre- and post-CNV formation.**

| <b>Shared Breakpoint</b> | <b>Pre-CNV A/T track length (bp)</b> | <b>Post-CNV A/T track length (bp)</b> | <b>% change</b> | <b># of supporting split-reads</b> | <b>Mean phred score of split-read bases</b> |
|--------------------------|--------------------------------------|---------------------------------------|-----------------|------------------------------------|---------------------------------------------|
| DSM1F/C_3                | 37                                   | 31                                    | -16             | 30                                 | 60                                          |
| CladoA/C_5               | 40                                   | ND                                    | ND              | ND                                 | ND                                          |
| F7/3B6_5                 | 24                                   | 29                                    | +21             | 2                                  | 60                                          |
| 1F4/1E3_5                | 33                                   | 29                                    | -12             | 1                                  | 60                                          |
| 3B6/1E3_3                | 35                                   | 29                                    | -18             | 3                                  | 60                                          |
| <b>Average</b>           | <b>34</b>                            | <b>30</b>                             | <b>-6</b>       | <b>14</b>                          | <b>60</b>                                   |
| <b>Unique Breakpoint</b> | <b>Pre-CNV A/T track length (bp)</b> | <b>Post-CNV A/T track length (bp)</b> | <b>% change</b> |                                    |                                             |
| DSM1C_5                  | 29                                   | 31                                    | +7              | 30                                 | 60                                          |
| DSM1D_5                  | 38                                   | 20                                    | -47             | 1                                  | 60                                          |
| DSM1D_3                  | 28                                   | 20                                    | -29             | 1                                  | 60                                          |
| DSM1E_5@                 | 21                                   | 15                                    | -29             | ND                                 | ND                                          |
| DSM1E_5@                 | 36                                   | 15                                    | -58             | ND                                 | ND                                          |
| DSM1-F@                  | 32                                   | 25                                    | -22             | ND                                 | ND                                          |
| HFGRII_5                 | 31                                   | ND                                    | ND              | ND                                 | ND                                          |
| HFGRII_3                 | N/A^                                 | N/A^                                  | N/A^            | N/A^                               | N/A^                                        |
| HFGRIII_5                | 41                                   | 31                                    | -24             | 2                                  | 60                                          |
| HFGRIII_3                | 41                                   | 31                                    | -24             | 2                                  | 60                                          |
| CladoA_3                 | 32                                   | ND                                    | ND              | ND                                 | ND                                          |
| CladoB5                  | 40                                   | ND                                    | ND              | ND                                 | ND                                          |
| CladoB3                  | 38                                   | ND                                    | ND              | ND                                 | ND                                          |
| CladoC3                  | 27                                   | ND                                    | ND              | ND                                 | ND                                          |
| PQA11_5                  | 37                                   | 26                                    | -30             | 10                                 | 60                                          |
| PQA11_3                  | 26                                   | 26                                    | 0               | 10                                 | 60                                          |
| 1F4_3                    | 25*                                  | ND                                    | ND              | ND                                 | ND                                          |
| 2G9_5                    | 33                                   | 29                                    | -12             | 3                                  | 60                                          |
| 2G9_3                    | 35                                   | 29                                    | -18             | 3                                  | 60                                          |
| 33XC3_5                  | N/A^                                 | N/A^                                  | N/A^            | N/A^                               | N/A^                                        |
| 33XC3_3                  | N/A^                                 | N/A^                                  | N/A^            | N/A^                               | N/A^                                        |
| 3C3_5                    | 19                                   | 18                                    | -5              | 3                                  | 60                                          |
| 3C3_3                    | 34                                   | 18                                    | -47             | 3                                  | 60                                          |
| R2B2_5                   | 24                                   | ND                                    | ND              | ND                                 | ND                                          |
| R2B2_3                   | 26                                   | ND                                    | ND              | ND                                 | ND                                          |
| 1B2ch10_5                | 35                                   | ND                                    | ND              | ND                                 | ND                                          |
| 1B2ch10_3                | N/A^                                 | ND                                    | ND              | ND                                 | ND                                          |
| 1B2ch12_5                | 30                                   | 29                                    | -3              | 3                                  | 60                                          |
| 1B2ch12_3                | 24                                   | 29                                    | +21             | 3                                  | 60                                          |
| <b>Average</b>           | <b>32</b>                            | <b>25</b>                             | <b>-17</b>      | <b>7</b>                           | <b>60</b>                                   |

Post-CNV A/T track length was determined through split-reads from whole genome sequencing data. ND = not determined due to absence of split-reads mapped across breakpoints. N/A^ = AT dinucleotide repeats instead of A/T tracks, \* = imperfect A/T track repeat

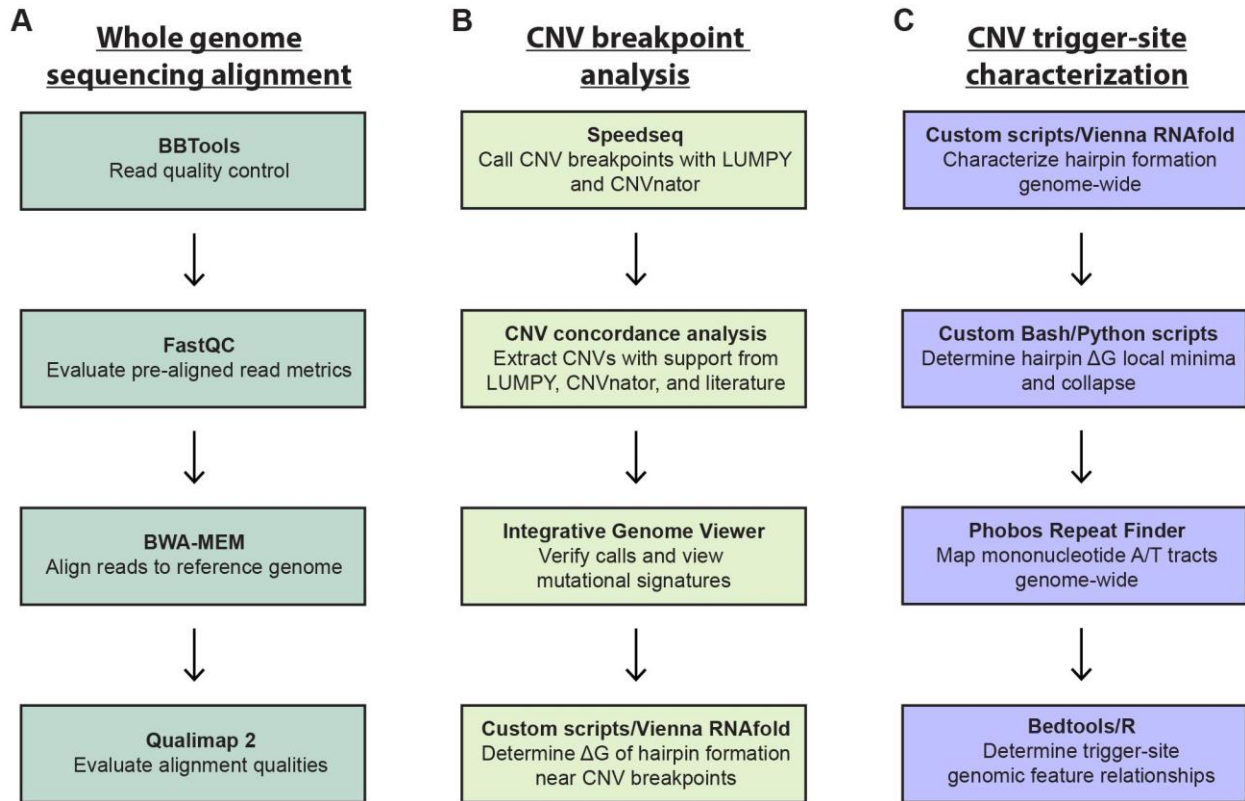

**Supplementary Figure S1: Bioinformatic analysis of *Plasmodium* CNVs.** **A.** Alignment of whole genome sequencing reads starts with BBTools to remove low quality bases or adapter sequences and verify correct pairing of reads. The resulting “clean” paired reads are evaluated by FastQC for overrepresented sequences, per base read qualities, and read length distributions. After passing read quality control, BWA-MEM is used to align “clean” paired reads to the *3d7 Plasmodium falciparum* reference genome. Qualimap 2 is then used to evaluate the alignments for mean/median read depth, paired read insert distributions, and mapping quality. **B.** After passing mapping quality control, Speedseq is used to call structural variants and CNVs with support from LUMPY, CNVnator, and positions from previous reports. The Integrative Genome Viewer is then used to manually verify CNV calls and evaluate mutational signatures such as read-pair orientation, CNV breakpoint sequences (i.e. A/T tract length), and proximal sequence changes that arise during CNV formation. Sequences windows around verified CNV breakpoints are extracted using a combination of custom Bash and Python scripts to create 50bp sliding windows with a 1bp shift and submitted to Vienna RNAfold for stable hairpin prediction. **C.** For genome-wide analysis, Vienna RNAfold is used to evaluate hairpin formation across all chromosomes (excluding subtelomeric/telomeric regions 50kb from the ends). Custom Bash/Python scripts are used to find local hairpin minima to find “stable hairpin forming regions”. Phobos Repeat Finder is used on the same sequences to map mononucleotide A/T tracts. After mapping mononucleotide A/T tracts and stable hairpin forming regions, Bedtools and R are used to determine trigger-site feature relationships.

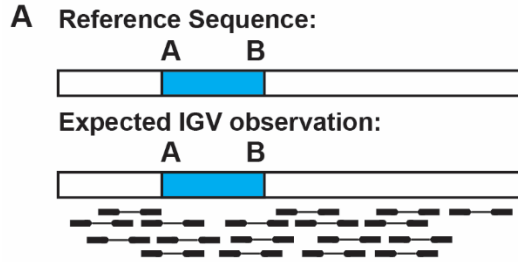

Reference concordant example:

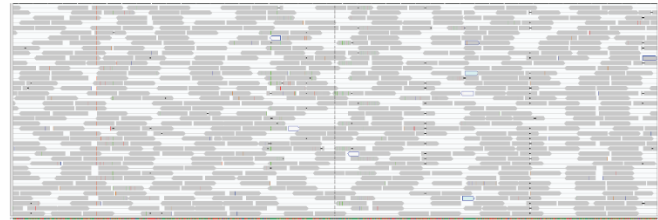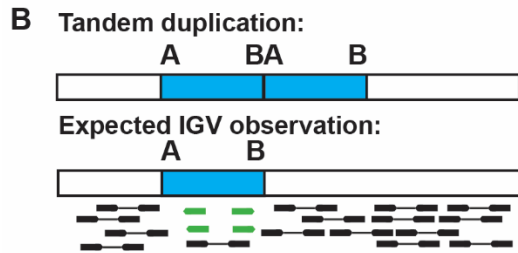

C710 breakpoints:

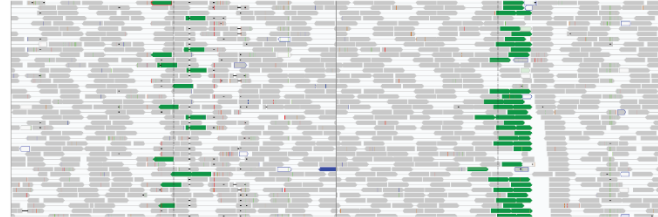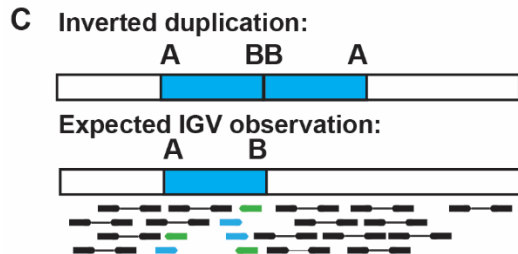

HFGR11 breakpoints:

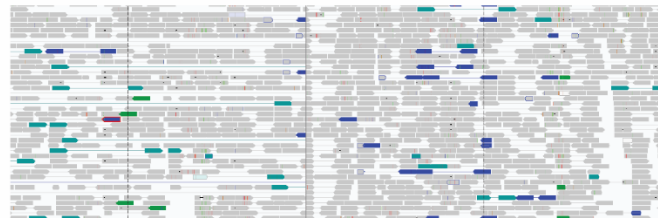

**Supplementary Figure S2: Discordant read orientation of duplications.** **A.** Reads aligning to the reference genome are colored based on read orientation and shown as pairs in IGV version 2.4.10. If reads match the reference sequence, they are expected to be gray and face towards each other as in the reference concordant example. **B.** If reads are found in a tandem duplication with respect to the reference sequence, they are colored green and face away from each other as in the C710 breakpoint example. These reads are shown with their pairs at their respective breakpoints and the insert sizes correspond to the size of the duplication. **C.** If reads are found in an inverted duplication with respect to the reference sequence, they are colored both blue and teal and are found facing each other and overlapping.

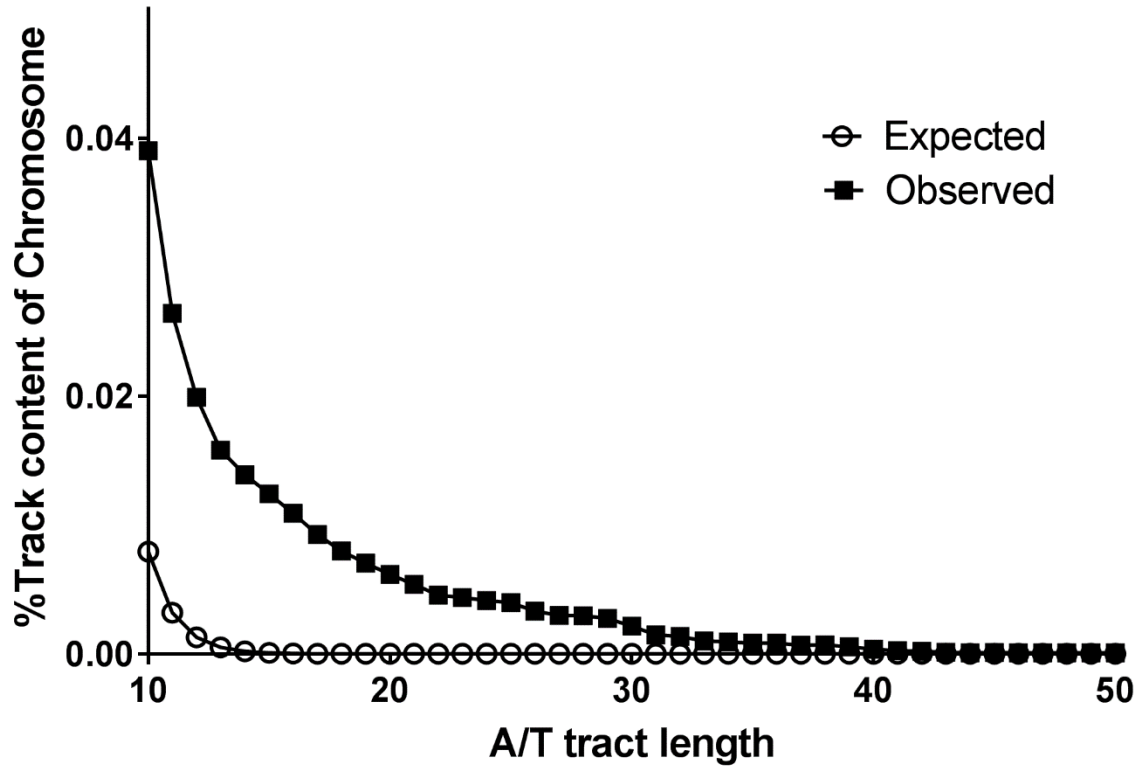

**Supplementary Figure S3: Expected vs observed frequency of long A/T tracks.** Frequency of (# tracks observed/chromosome length) for varying A/T tract lengths on all chromosomes. For equations used in calculation, see *Materials and Methods*.

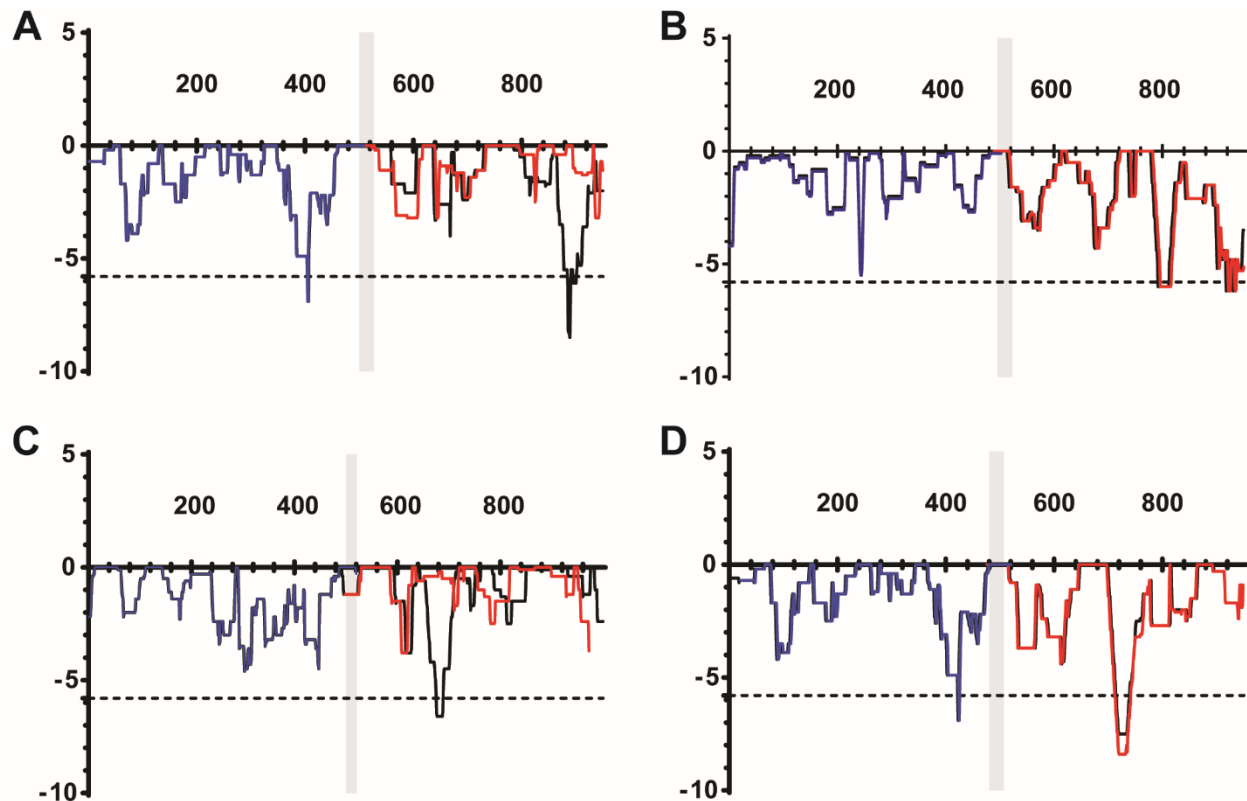

**Supplementary Figure S4: Post-CNV junctions indicate action of distinct repair pathways.** Hairpin stability ( $\Delta G$ ) across 1kb of sequence at novel junctions created by the generation of CNVs (see **Fig. 4B**). Red and blue lines indicate *predicted* error-free repair utilizing pre-CNV sequence, black lines demark *observed* post-CNV sequence. Conserved junctions from D and F clones (panels **B** and **D**, respectively) indicate MMEJ action (see Fig. 4. Novel junctions created post-CNV from C and E clones (panels **A** and **C**, respectively) indicate MMBIR action (also see **Fig. 4C** and **D**). Significant hairpins fall below the dotted black line (see methods for details on cut-off, -5.8 kcal/mol). The location of the A/T track at upstream and downstream breakpoints are indicated with vertical grey bars.

#### SUPPLEMENTARY REFERENCES

1. Guler, J.L., Freeman, D.L., Ahyong, V., Patrapuvich, R., White, J., Gujjar, R., Phillips, M.A., DeRisi, J. and Rathod, P.K. (2013) Asexual populations of the human malaria parasite, *Plasmodium falciparum*, use a two-step genomic strategy to acquire accurate, beneficial DNA amplifications. *PLoS Pathog*, **9**, e1003375.
2. Herman, J.D., Rice, D.P., Ribacke, U., Silterra, J., Deik, A.A., Moss, E.L., Broadbent, K.M., Neafsey, D.E., Desai, M.M., Clish, C.B. *et al.* (2014) A genomic and evolutionary approach reveals non-genetic drug resistance in malaria. *Genome Biology*, **15**, 511.
3. Cowell, A.N., Istvan, E.S., Lukens, A.K., Gomez-Lorenzo, M.G., Vanaerschot, M., Sakata-Kato, T., Flannery, E.L., Magistrado, P., Owen, E., Abraham, M. *et al.* (2018) Mapping the malaria parasite druggable genome by using in vitro evolution and chemogenomics. *Science*, **359**, 191-199.
